# Supplementary material for: The Therapeutic Prospects of Targeting IL-1R1 for the Modulation of Neuroinflammation in Central Nervous System Disorders
Source: Int J Mol Sci. 2022 Feb 2;23(3):1731. doi: 10.3390/ijms23031731 (PMC8915186; doi:10.3390/ijms23031731)
Supplement: Supplementary file 1 [file ijms-23-01731-s001.zip › ijms-1545562-supplementary.pdf]

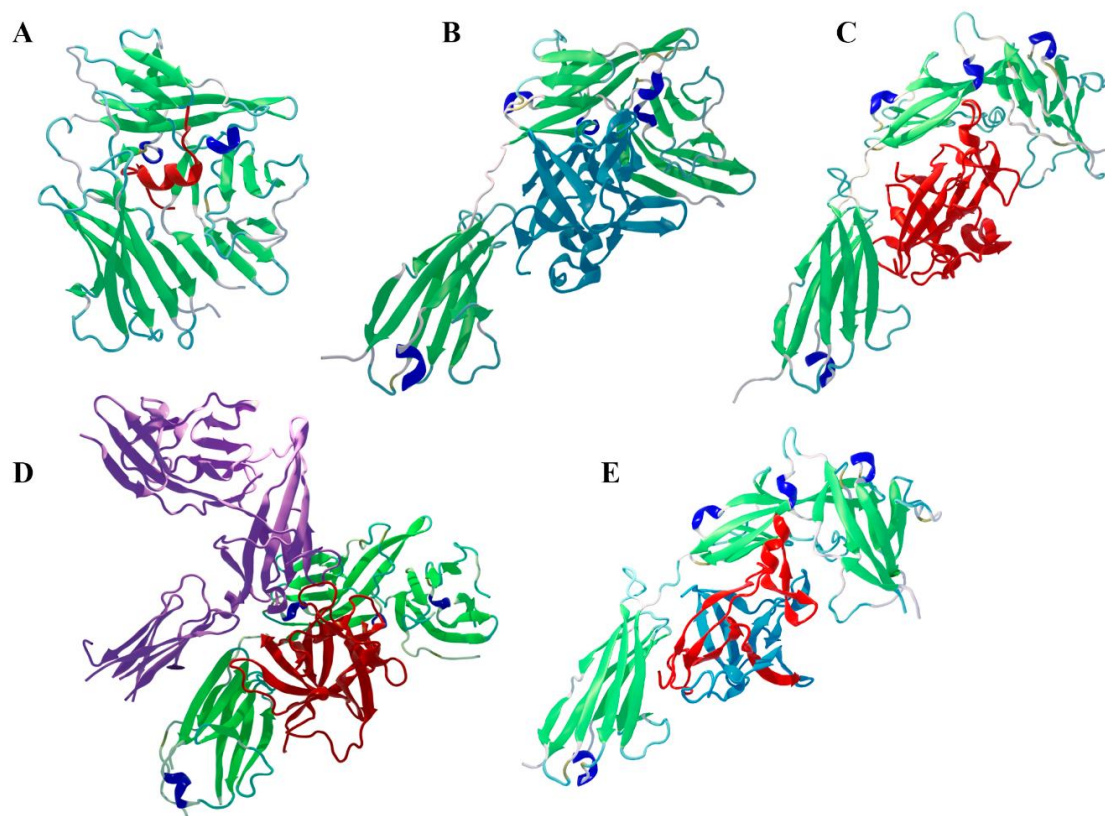

**Figure S1. Three-dimensional (3D) representations of the extracellular domain of interleukin-1 receptor type 1 (IL-1R1-ECD)-ligand bound complexes available in the PDB.** X-ray structure of IL-1R1-ECD bound (A) to a small antagonist peptide AF10847 (coloured in red), adopting a closed conformation (PDB entry 1G0Y); (B) to interleukin-1 receptor antagonist (IL-1Ra, coloured in blue) (PDB entry 1IRA); (C) to interleukin-1 $\beta$  (IL-1 $\beta$ , coloured in red) (PDB entry 1ITB); (D) to IL-1 $\beta$  (coloured in red) and the receptor accessory protein (IL-1RAcP, coloured in purple) (PDB entry 4DEP); and (E) to EBI-005, a chimera of human IL-1 $\beta$  and IL-1Ra (coloured in blue and red) (PDB entry 4GAF).

| A              |              |           |         |           | B              |              |           |         |           |
|----------------|--------------|-----------|---------|-----------|----------------|--------------|-----------|---------|-----------|
| Res #          | Human IL-1R1 | Human Res | Rat Res | Mouse Res | Res #          | Human IL-1R1 | Human Res | Rat Res | Mouse Res |
| Site A – IL-1β |              |           |         |           | Site B – IL-1β |              |           |         |           |
| 9              | Arg          | R         | Y       | Y         | 237            | Leu          | L         | F       | F         |
| 12             | Lys          | K         | E       | Q         | 239            | Asp          | D         | D       | D         |
| 13             | Ile          | I         | V       | I         | 240            | Ile          | I         | L       | L         |
| 14             | Ile          | I         | I       | V         | 244            | Lys          | K         | K       | K         |
| 15             | Leu          | L         | S       | L         | 249            | Val          | V         | E       | E         |
| 16             | Val          | V         | F       | F         | 250            | Ile          | I         | I       | I         |
| 30             | Asn          | N         | T       | T         | 251            | Asp          | D         | E       | E         |
| 31             | Pro          | P         | P       | P         | 252            | Glu          | E         | W       | W         |
| 108            | Gln          | Q         | Q       | Q         | 253            | Asp          | D         | D       | N         |
| 109            | Ala          | A         | A       | A         | 259            | Glu          | E         | E       | E         |
| 110            | Ile          | I         | S       | T         | 260            | Asp          | D         | D       | D         |
| 111            | Phe          | F         | F       | F         | 261            | Tyr          | Y         | Y       | Y         |
| 112            | Lys          | K         | I       | P         | 262            | Tyr          | Y         | Q       | Q         |
| 113            | Gln          | Q         | Q       | Q         | 263            | Ser          | S         | F       | F         |
| 114            | Lys          | K         | R       | R         | 265            | Glu          | E         | E       | E         |
| 115            | Leu          | L         | L       | L         | 275            | Leu          | L         | L       | L         |
| 116            | Pro          | P         | H       | H         |                |              |           |         |           |
| 127            | Tyr          | Y         | Y       | Y         |                |              |           |         |           |
| 129            | Glu          | E         | D       | S         |                |              |           |         |           |
|                |              | 19        | 8       | 9         |                |              | 16        | 9       | 8         |
|                |              | %id -->   | 42      | 47        |                |              | %id -->   | 56      | 50        |

**Figure S2. Comparison of human, rat and mouse interleukin-1 receptor type 1 (IL-1R1) protein sequences and structure.** Protein sequence alignment for residues (one-letter code) comprising (A) site A and (B) site B of IL-1R1, which establish interactions with IL-1β. The sequence alignment was produced using the Clustal Omega Server [192]. Conservation across orthologs is color coded as green, for full conservation across the three orthologs (a whole green table line represents 100% conservation); yellow, for amino acid differences with similar side-chain properties; red, for amino acid differences with distinct side-chain properties.

| A                       |              |           |         |           | B                       |           |          |         |           |
|-------------------------|--------------|-----------|---------|-----------|-------------------------|-----------|----------|---------|-----------|
| Res #                   | Human IL-1R1 | Human Res | Rat Res | Mouse Res | Res #                   | Human Res | Human IL | Rat Res | Mouse Res |
| Pocket P <sub>o_1</sub> |              |           |         |           | Pocket P <sub>o_2</sub> |           |          |         |           |
| 202                     | Glu          | E         | D       | D         | 53                      | Gln       | Q        | K       | R         |
| 203                     | Glu          | E         | D       | E         | 60                      | His       | H        | Q       | Q         |
| 204                     | Asn          | N         | S       | N         | 61                      | Lys       | K        | N       | N         |
| 205                     | Lys          | K         | K       | K         | 63                      | Lys       | K        | H       | H         |
| 206                     | Pro          | P         | R       | R         | 65                      | Trp       | W        | W       | W         |
| 207                     | Thr          | T         | D       | D         | 125                     | Cys       | C        | C       | C         |
| 208                     | Arg          | R         | R       | R         | 128                     | Met       | M        | L       | V         |
| 209                     | Pro          | P         | P       | P         | 129                     | Glu       | E        | D       | S         |
| 210                     | Val          | V         | V       | V         | 130                     | Phe       | F        | F       | Y         |
| 234                     | Thr          | T         | T       | T         | 131                     | Phe       | F        | F       | F         |
| 235                     | Gly          | G         | G       | G         | 132                     | Lys       | K        | K       | K         |
| 236                     | Gln          | Q         | Q       | Q         | 133                     | Asn       | N        | D       | D         |
| 237                     | Leu          | L         | F       | F         | 134                     | Glu       | E        | E       | E         |
| 238                     | Ser          | S         | T       | S         | 138                     | Leu       | L        | L       | L         |
| 239                     | Asp          | D         | D       | D         | 139                     | Pro       | P        | P       | P         |
| 240                     | Ile          | I         | L       | L         | 141                     | Leu       | L        | V       | V         |
| 265                     | Glu          | E         | E       | E         | 179                     | Cys       | C        | C       | C         |
| 270                     | Lys          | K         | K       | K         | 180                     | His       | H        | R       | R         |
| 271                     | Arg          | R         | R       | R         | 181                     | Ala       | A        | T       | M         |
| 272                     | Arg          | R         | K       | K         | 182                     | Ser       | S        | S       | S         |
| 273                     | Ser          | S         | Y       | Y         | 183                     | Tyr       | Y        | Y       | Y         |
| 298                     | Lys          | K         | K       | K         | 184                     | Thr       | T        | T       | T         |
| 299                     | Asn          | N         | N       | N         | 185                     | Tyr       | Y        | Y       | F         |
| 300                     | Thr          | T         | T       | T         | 186                     | Leu       | L        | Q       | R         |
| 301                     | His          | H         | H       | N         | 192                     | Ile       | I        | V       | V         |
|                         |              | 25        | 15      | 17        | 193                     | Thr       | T        | T       | T         |
|                         |              | %id -->   | 60      | 68        | 194                     | Arg       | R        | R       | R         |
|                         |              |           |         |           |                         |           | 27       | 15      | 13        |
|                         |              |           |         |           |                         |           | %id -->  | 55      | 48        |

**Figure S3. Comparison of human, rat and mouse interleukin-1 receptor type 1 (IL-1R1) protein sequences and structure.** Protein sequence alignment for residues (one-letter code) comprising two binding pockets – (A) P<sub>o\_1</sub> and (B) P<sub>o\_2</sub> – predicted in the crystal structure of human IL-1R1 (hIL-1R1) by DoGSiteScorer [200]. The sequence alignment was produced using the Clustal Omega Server [192]. Conservation across orthologs is color coded as green, for full conservation across the three orthologs (a whole green table line represents 100% conservation); yellow, for amino acid differences with similar side-chain properties; red, for amino acid differences with distinct side-chain properties.
